# Supplementary material for: Bambi and Sp8 Expression Mark Digit Tips and Their Absence Shows That Chick Wing Digits 2 and 3 Are Truncated
Source: PubMed Central journal article supplement (PMC3532063; doi:10.1371/journal.pone.0052781), 2012-12-28
Supplement: pone.0052781.s009.pdf [file pone.0052781.s009.pdf]

**Table 5: Expression of *Bambi* in transformed digits**

| <b>Table 5: Manipulations to induce change of identity in chick wing digit 2</b> |                 |                   |                                                           |                                       |                                                        |
|----------------------------------------------------------------------------------|-----------------|-------------------|-----------------------------------------------------------|---------------------------------------|--------------------------------------------------------|
| Number of embryos >>>>                                                           | Total Collected | Normal appearance | Abnormal but not obvious transformation of digit identity | Morphological transformation observed | <i>Bambi</i> expression present in transformed D2* tip |
| Type I Experiments: <u>Removal</u> of postP2+pID2                                | 84              | 9 (11% of total)  | 21 (25% of total)                                         | 54 (64% of total)                     | 8 (15% of transformed, 10% of collected)               |
| Type II Experiments: <u>Bisection</u> of P2                                      | 38              | 8 (21% of total)  | 12 (32% of total)                                         | 18 (47% of total)                     | 6 (33% of transformed, 16% of collected)               |

**Table 6: Expression of *Sp8* in transformed digits**

| <b>Table 6: Manipulations to induce change of identity in chick wing digit 2</b> |                 |                   |                                                           |                                       |                                                      |
|----------------------------------------------------------------------------------|-----------------|-------------------|-----------------------------------------------------------|---------------------------------------|------------------------------------------------------|
| Number of embryos >>>>                                                           | Total Collected | Normal appearance | Abnormal but not obvious transformation of digit identity | Morphological transformation observed | <i>Sp8</i> expression present in transformed D2* tip |
| Type I Experiments: <u>Removal</u> of postP2+pID2                                | 11              | 3 (27% of total)  | 2 (18% of total)                                          | 6 (55% of total)                      | 1 (17% of transformed, 9% of collected)              |
| Type II Experiments: <u>Bisection</u> of P2                                      | 33              | 6 (18% of total)  | 16 (48% of total)                                         | 11 (33% of total)                     | 3 (27% of transformed, 9% of collected)              |
